# Supplementary material
Source: publisher figshare collection journal article supplement (https://acs.figshare.com/ndownloader/files/3779254)
Supplement: Supplementary file 1 [file 3779254]

Supporting information for article:

## **Atomistic Molecular Insight into the Time Dependence of Polymer Glass Transition**

Rongliang Wu<sup>\*a</sup>, Xinlong Qiu<sup>a</sup>, Tianyi Zhang<sup>b</sup>, Kangyu, Fu<sup>a</sup>, Xiaozhen Yang<sup>c</sup>

a: College of Material Science and Engineering, State Key Laboratory for  
Modification of Chemical Fibers and Polymer Materials, Donghua University,  
Shanghai 201620, China,

b: Department of Applied Mathematics, School of Mathematical Science, Fudan  
University, Shanghai 200433, China

c: Beijing National Laboratory for Molecular Sciences, State Key Laboratory of  
Polymer Science and Engineering, Joint Laboratory of Polymer Science and Materials,  
Beijing 100190, China

<sup>\*</sup> To whom correspondences should be addressed:

Rongliang Wu: wurl@dhu.edu.cn; +8621 6779 2914;

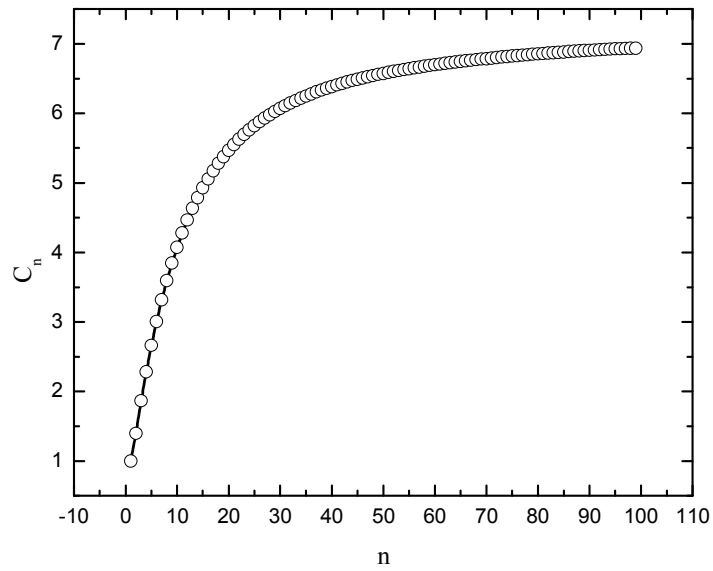

**Figure 1s.** Polymer characteristic ratios averaged over all chain segments along the backbone of the linear polymer chains.

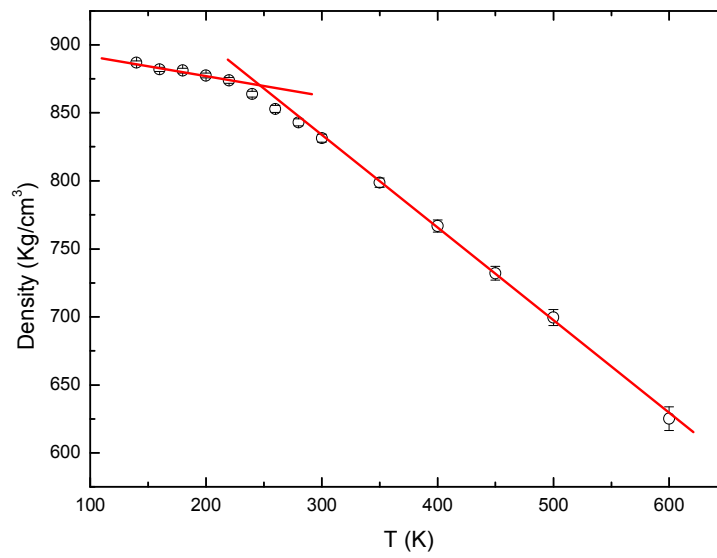

**Figure 2s.** Average densities of the systems during the production runs and the error bars show the standard deviations; the solid lines are linear fits, whose intersection around 250 K gives the volumetric glass transition.

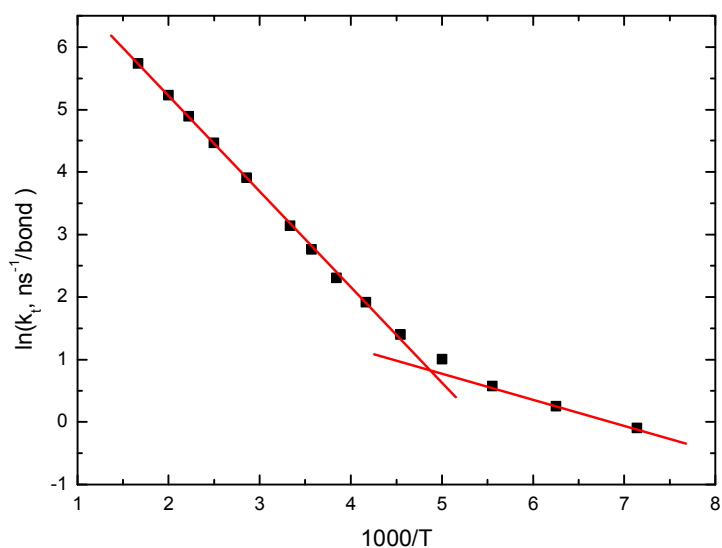

**Figure 3s.** The logarithmic overall conformational transition rates plotted with inverse temperature; the solid lines are linear fits, whose intersection around 206 K gives the microscopic glass transition, which was also discussed in our previous paper (J. Phys. Chem. B 2009, 113, 9077-9083).

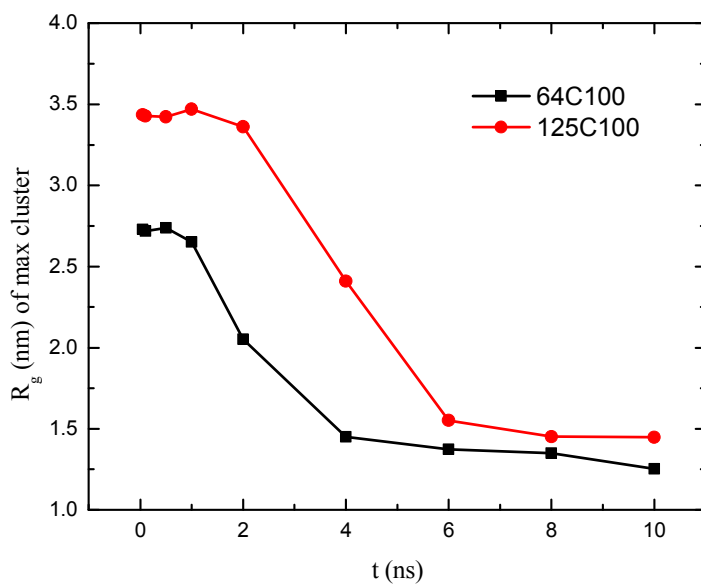

**Figure 4s.** Variation of the max cluster size at the same temperature of 200 K for 125C<sub>100</sub>H<sub>202</sub> and 64C<sub>100</sub>H<sub>202</sub>, whose system sizes are around 7.0 nm and 5.5 nm respectively. The frozen torsions obtained within smaller observation times in both systems formed volume spanning frozen clusters.
